# Supplementary material for: Development and clinical validation of a cross-sex translator of ECG drug responses
Source: bioRxiv or medRxiv preprint supplement (doi:10.1101/2024.12.27.24319698), 2024-12-29
Supplement: Supplementary file [file media-1.pdf]

## Supplementary Materials

### Development and clinical validation of a cross-sex translator of ECG drug responses

**Authors:**

Roshni Shetty<sup>1</sup>, Stefano Morotti<sup>1</sup>, Vladimír Sobota<sup>2</sup>, Jason D. Bayer<sup>2</sup>, Haibo Ni<sup>1</sup>, Eleonora Grandi<sup>1\*</sup>

**Affiliations:**

<sup>1</sup>Department of Pharmacology, University of California Davis; Davis, CA, USA.

<sup>2</sup>LIRYC Electrophysiology and Heart Modeling Institute, Fondation Bordeaux Université; Pessac-Bordeaux, France.

\*Corresponding author. Email: [ele.grandi@gmail.com](mailto:ele.grandi@gmail.com)

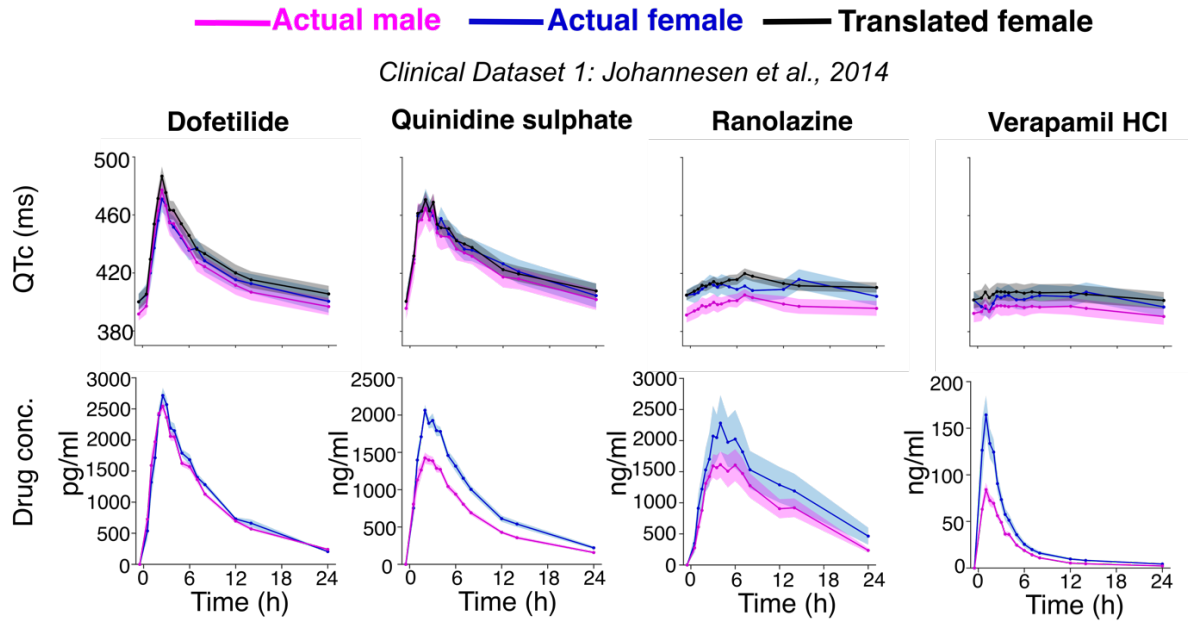

**Fig. S1.** Drug plasma concentrations (bottom) vs time and corresponding QTc intervals (top; re-plotted from Fig. 3A) over time for males (pink) and females (blue) in clinical dataset 1 (27, 29). Solid lines represent the mean values, with shaded areas indicating the standard error of the mean (SEM), and each column corresponds to a separate drug administration and monitoring over a 24-hour period. All subjects received identical drug dosages prior to ECG monitoring during a particular drug evaluation (27).

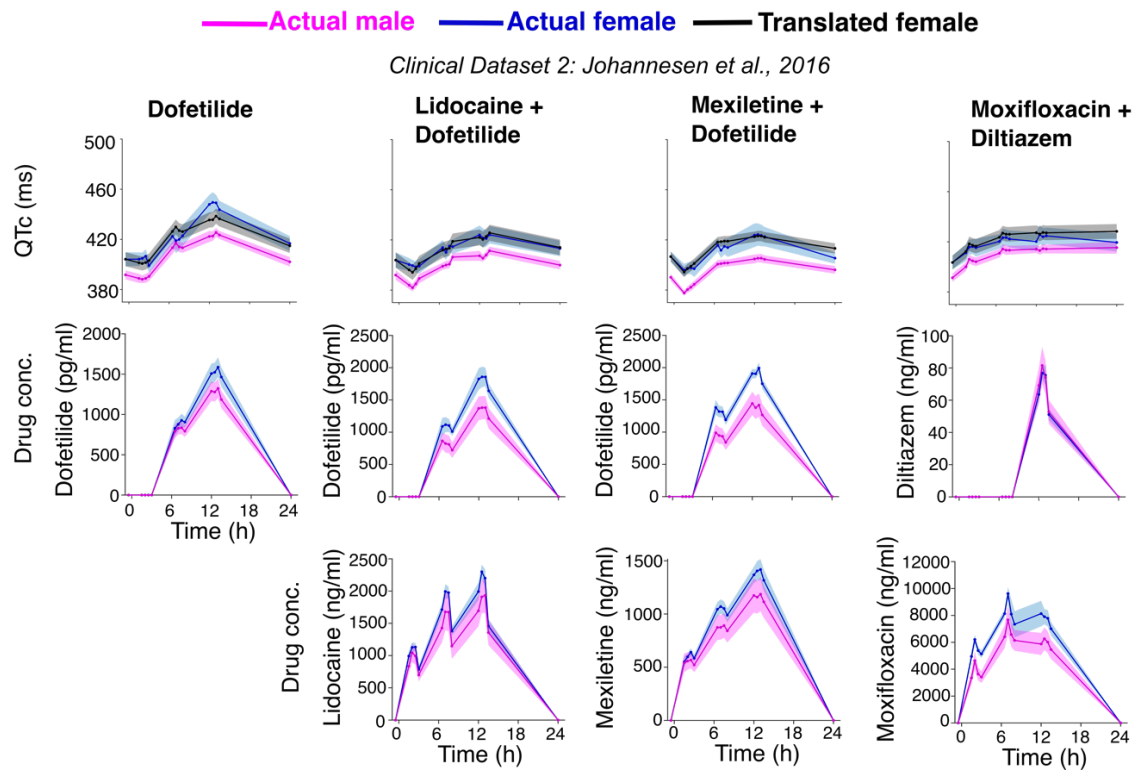

**Fig. S2.** Drug plasma concentrations (bottom) vs time and corresponding QTc intervals (top; re-plotted from Fig. 4A) over time for males (pink) and females (blue) in clinical dataset 2 (29, 28); Solid lines represent the mean values, with shaded areas indicating the standard error of the mean (SEM), and each column corresponds to a separate drug administration and monitoring over a 24-hour period. All subjects received identical drug dosages prior to ECG monitoring during a particular drug combination evaluation and were dosed three times during the day (28).

**Table. S1. Effects of sex-diverging** plasma concentrations of quinidine on major ionic currents at maximum value of difference in mean plasma concentrations during quinidine administration in male vs female: 2065 ng/mL (2638 nM) in female vs 1425 ng/mL (1820 nM) in male at time point 2 hours (shown in **Fig. S1**). Row 1: IC50 (nM) and hill coefficient ( $n_h$ ) for ion channels blocked by quinidine (Data from (34)); Effect  $k = 1/(1+([D]/IC50)^{n_h})$ , where [D] is the drug concentration at 1820 nM (Row 2) and 2638 nM (Row 3).

| Quinidine<br>CIPA  | $I_{Kr}$     | $I_{NaL}$     | $I_{CaL}$        | $I_{Na}$       | $I_{to}$        | $I_{K1}$          | $I_{Ks}$        |
|--------------------|--------------|---------------|------------------|----------------|-----------------|-------------------|-----------------|
| IC50<br>( $n_h$ )  | 992<br>(0.8) | 9417<br>(1.3) | 51592.3<br>(0.6) | 12329<br>(1.5) | 3487.4<br>(1.3) | 39589919<br>(0.4) | 4898.9<br>(1.4) |
| k<br>[D] = 1820 nM | 0.3810       | 0.8944        | 0.8815           | 0.9463         | 0.6996          | 1                 | 0.80            |
| k<br>[D] = 2638 nM | 0.3138       | 0.8395        | 0.8562           | 0.9100         | 0.5898          | 0.9755            | 0.7041          |

**Table. S2.** Analysis of simulated QTc from baseline male and female cable models and following administration of quinidine concentration 1820 nM (Row 1) and 2638 nM (Row 2).

| Quinidine<br>Concentration<br>[D] | QTc<br>simulated<br>(male)<br>ms | QTc simulated % increase<br>from baseline male<br>(285.3ms) | QTc simulated<br>(female)<br>ms | QTc simulated %<br>increase from baseline<br>female<br>(340.8ms) |
|-----------------------------------|----------------------------------|-------------------------------------------------------------|---------------------------------|------------------------------------------------------------------|
| 1820 nM                           | 456.0                            | 59.8%                                                       | 533.4                           | 56.5%                                                            |
| 2638 nM                           | 498.6                            | 74.8%                                                       | 582.0                           | 70.8%                                                            |
